# Supplementary material for: Time-Resolved MRI Assessment of Convection-Enhanced Delivery by Targeted and Nontargeted Nanoparticles in a Human Glioblastoma Mouse Model
Source: Oxford University Press journal article supplement (doi:10.1158/0008-5472.can-18-2998), 2019-07-22
Supplement: 00085472can182998-sup-209309_3_supp_5626881_ph3dqz.docx [file 00085472can182998-sup-209309_3_supp_5626881_ph3dqz.docx]

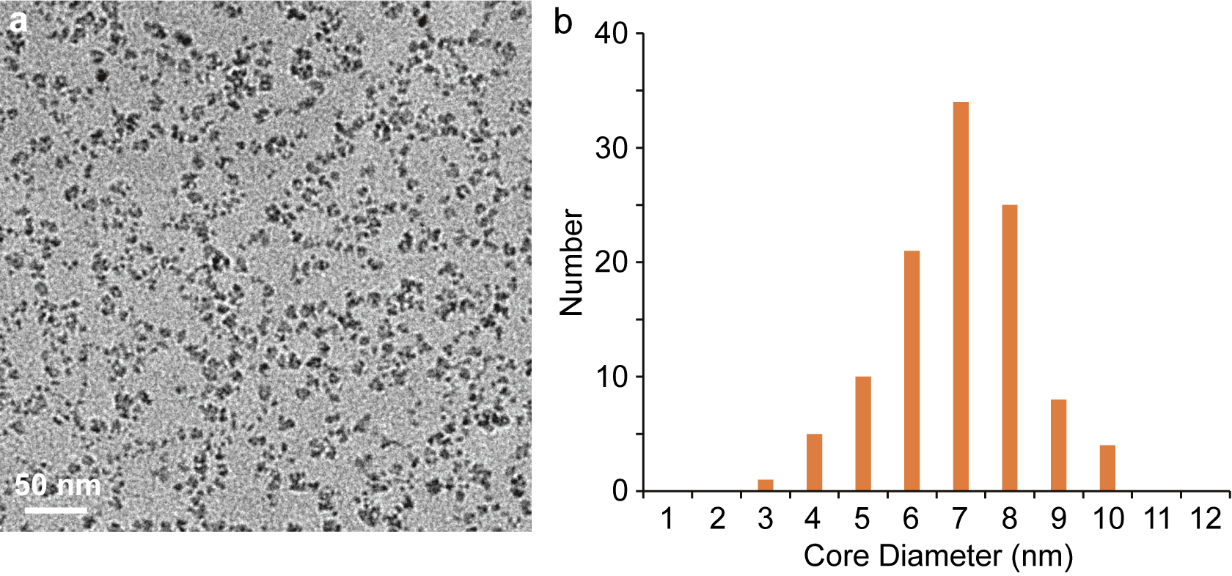


**Supplementary Figure S1.** NPCP-CTX core size analysis. (a) Representative TEM image of NPCP-CTX. Scale bar corresponds to 50 nm. (b) Distribution of NPCP-CTX core diameters yielding a mean of 7.0 ± 1.4 nm determined from 100 independent core measurement using ImageJ software.
