# Supplementary material for: Time-Resolved MRI Assessment of Convection-Enhanced Delivery by Targeted and Nontargeted Nanoparticles in a Human Glioblastoma Mouse Model
Source: Oxford University Press journal article supplement (doi:10.1158/0008-5472.can-18-2998), 2019-07-22
Supplement: 00085472can182998-sup-209309_3_supp_5626883_pm3dqz.docx [file 00085472can182998-sup-209309_3_supp_5626883_pm3dqz.docx]

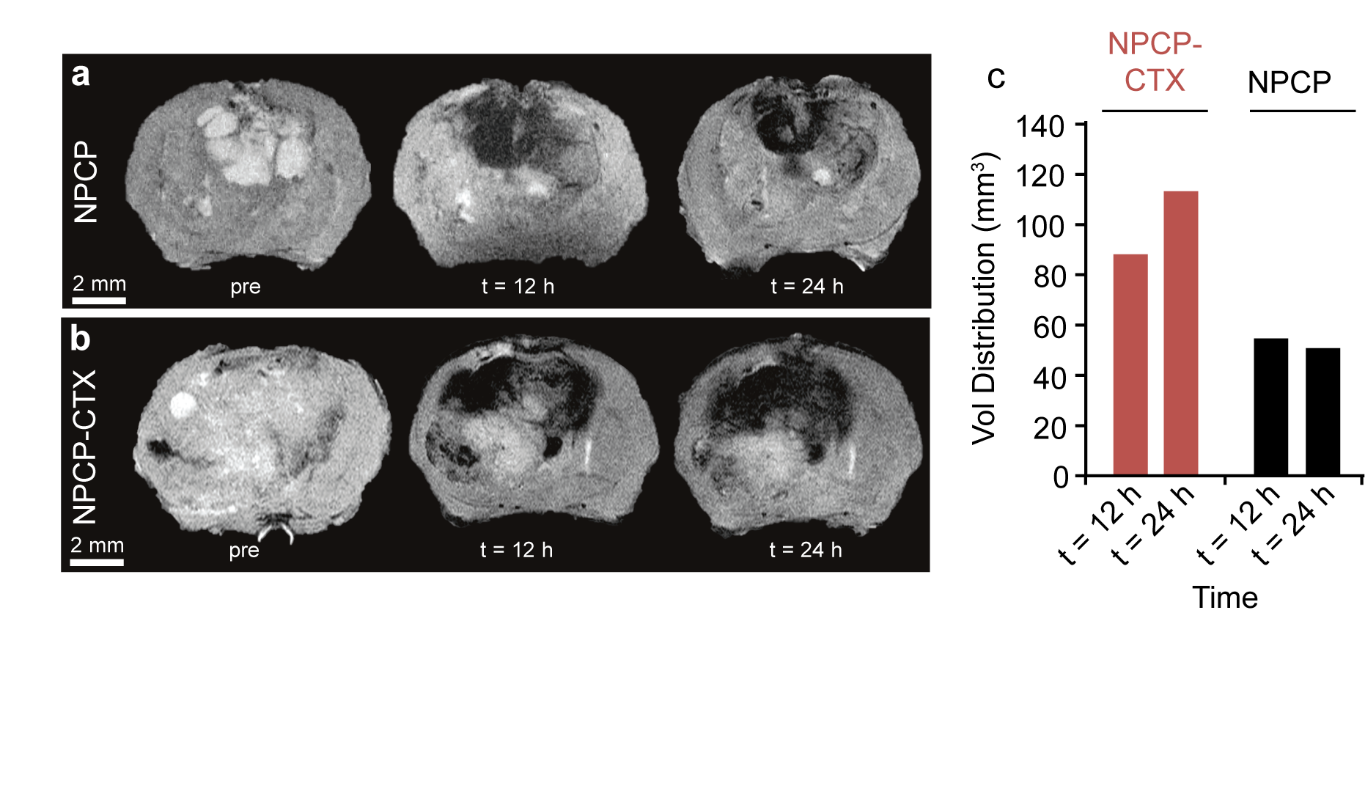


**Supplementary Figure S2.** T2-weighted MRI for determination of VD in a syngeneic glioma model comprised of GL261 glioma cells implanted intracranially in C57Bl/6 mice. (a and b) Representative T2-weighted transverse images from the tumor region for (a) NPCP and (b) NPCP-CTX treated mice. (c) VD comparison for NPCP-CTX (red) and NPCP (black) treated mice.
